# Supplementary material for: Two-step single-reactor synthesis of oleic acid- or undecylenic acid-stabilized magnetic nanoparticles by thermal decomposition
Source: publisher site journal article supplement (doi:10.3762/bjnano.14.2), 2023-01-03
Supplement: Additional file 1 [file 2190-4286-14-2-S1.pdf]

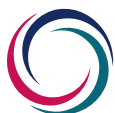

## Supporting Information

for

### **Two-step single-reactor synthesis of oleic acid- or undecylenic acid-stabilized magnetic nanoparticles by thermal decomposition**

Mykhailo Nahorniak, Pamela Pasetto, Jean-Marc Greneche, Volodymyr Samaryk, Sandy Auguste, Anthony Rousseau, Nataliya Nosova and Serhii Varvarenko

*Beilstein J. Nanotechnol.* **2023**, *14*, 11–22. [doi:10.3762/bjnano.14.2](https://doi.org/10.3762/bjnano.14.2)

## Additional figures

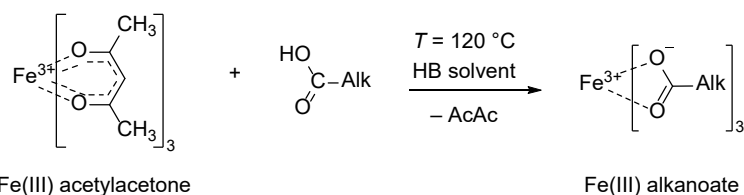

**Figure S1:** Fe(III) alkanolate is formed by the ligand exchange reaction of Fe(III) acetylacetonate in the presence of higher carboxylic acid. HB Solvent: 1-octadecene, paraffin or diphenyl.

Attenuated total reflection Fourier-transform infrared spectroscopy.

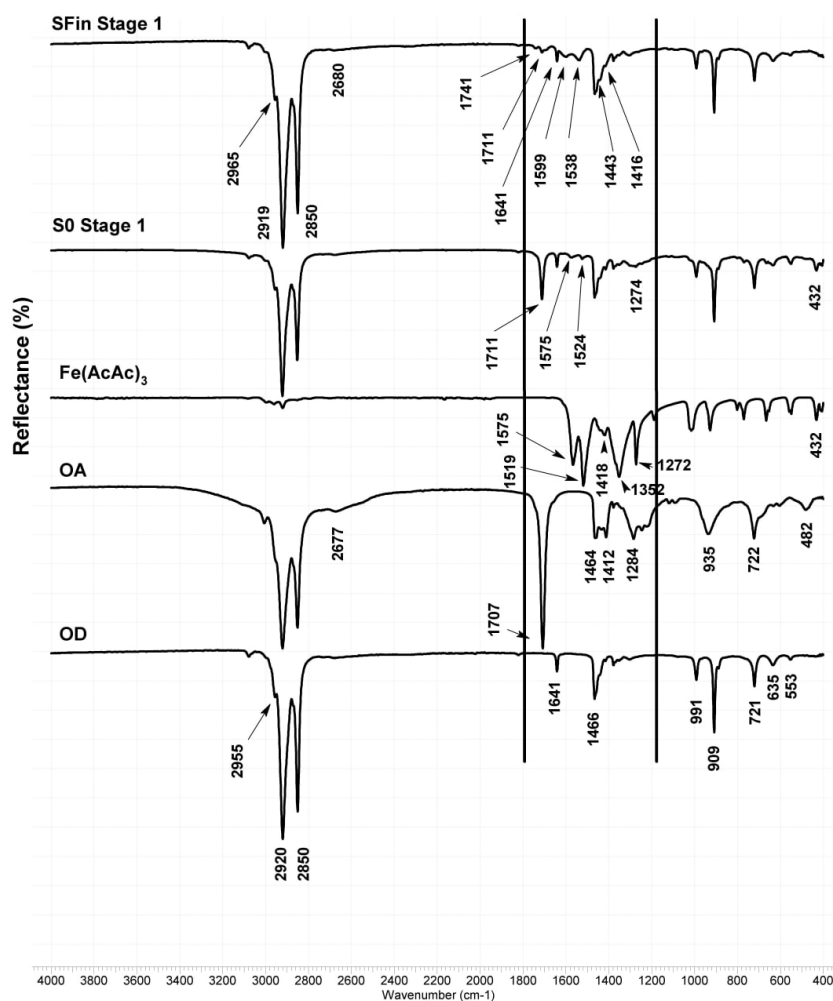

**Figure S2:** FTIR spectra: 1-octadecene (OD); oleic acid (OA); and Fe(III) acetylacetonate (Fe(AcAc)<sub>3</sub>). Reaction mixture containing Fe(III) acetylacetonate and oleic acid in 1-octadecene at the beginning of the first stage of the synthesis of NPM prior to the removal of acetylacetonate under vacuum (S0 Stage1); the reaction mixture containing Fe(III) oleate in octadecene at the end of the first stage of NPM synthesis after removal of acetylacetonate under vacuum (SFin Stage1). The studies were conducted under the conditions of TMO-I sample synthesis.

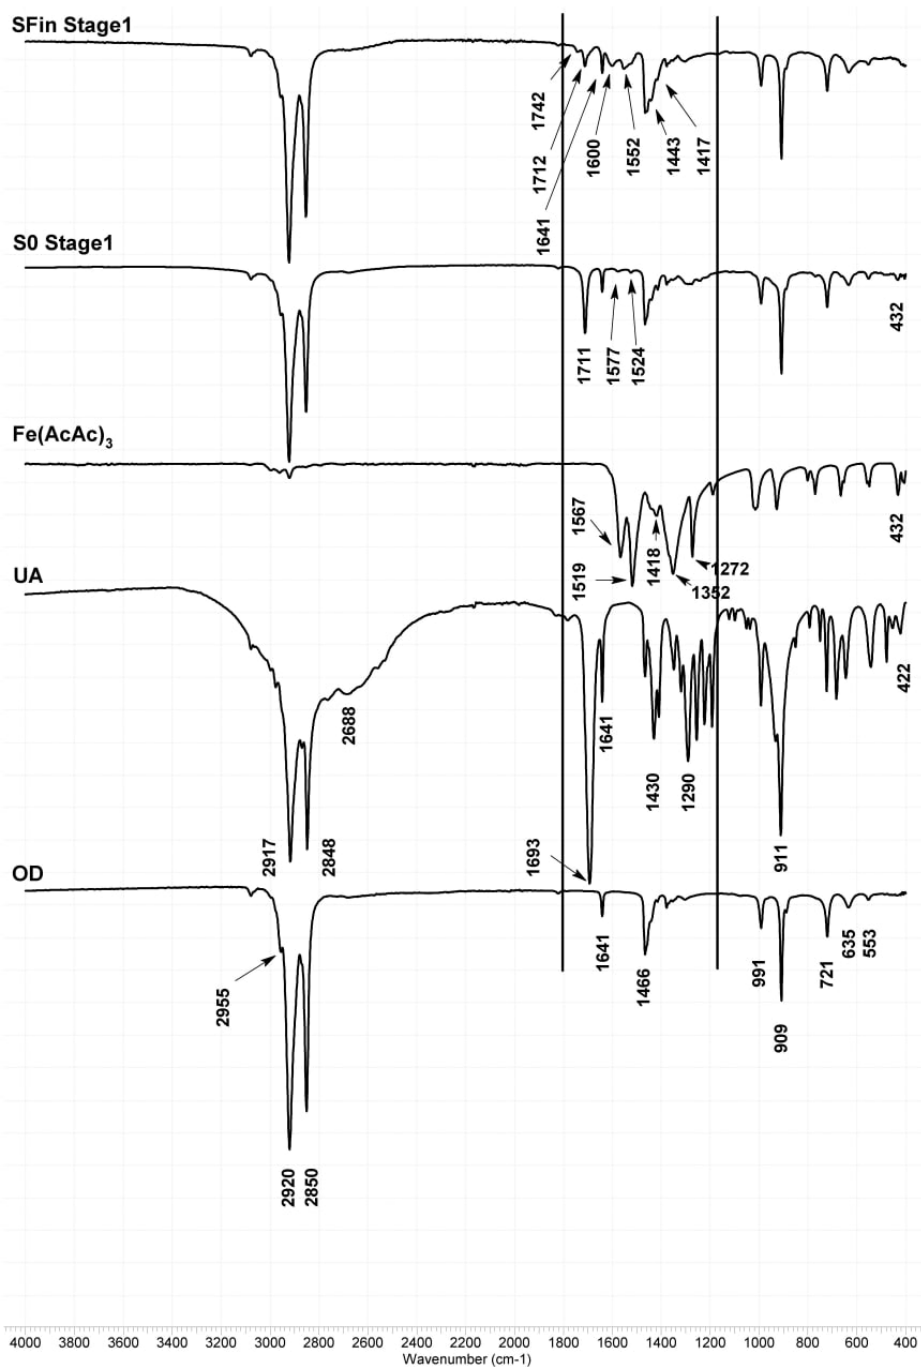

**Figure S3:** FTIR spectra: 1-octadecene (OD); undecylenic acid (UA); Fe(III) acetylacetonate ( $\text{Fe}(\text{AcAc})_3$ ). Reaction mixture containing Fe(III) acetylacetonate and undecylenic acid in 1-octadecene at the beginning of the first stage of the synthesis of NPM prior to the removal of acetylacetonate under vacuum (S0 Stage1); the reaction mixture containing Fe(III) undecylate in octadecene at the end of the first stage of NPM synthesis after removal of acetylacetonate under vacuum (SFin Stage1). The studies were conducted under the conditions of TMU-V sample synthesis.
